# Supplementary material
Source: PubMed Central journal article supplement (PMC4850349)
Supplement: mmc1.pdf [file mmc1.pdf]

**Biophysical Journal, Volume 110**

**Supplemental Information**

**The Influence of Lipid Bilayer Physicochemical Properties on Gramicidin A Conformer Preferences**

**John W. Patrick, Roberto C. Gamez, and David H. Russell**

**Biophysical Journal**

**Supporting Material**

**The Influence of Lipid Bilayer Physicochemical Properties on Gramicidin A Conformer Preferences**

John W. Patrick,<sup>1</sup> Roberto C. Gamez,<sup>1</sup> and David H. Russell<sup>1,\*</sup>

<sup>1</sup>Department of Chemistry, Texas A&M University, College Station, Texas

\*Correspondence: russell@chem.tamu.edu

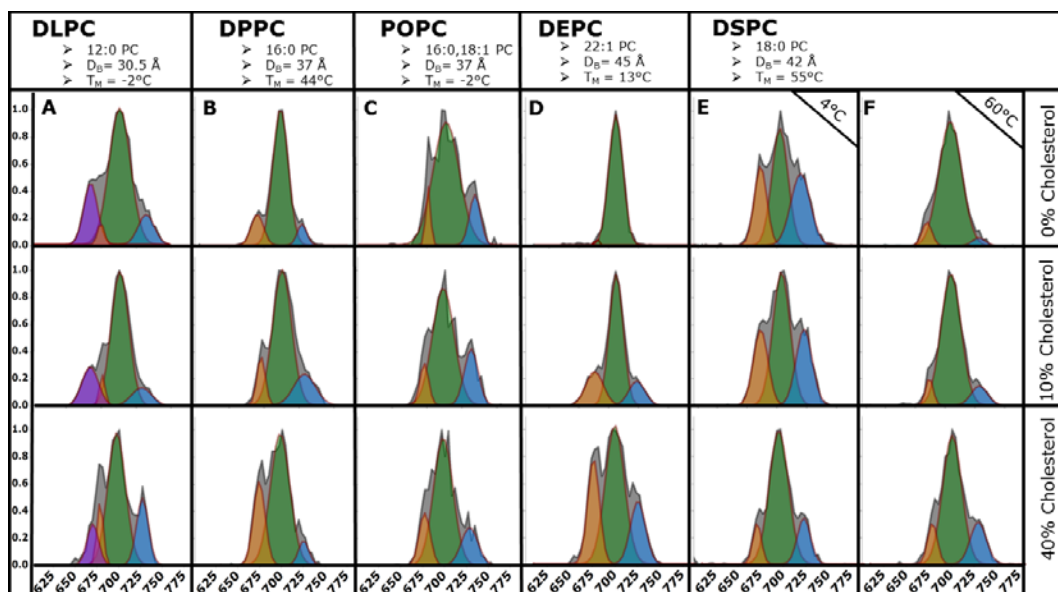

**Figure S1** – CCS profiles for  $[2\text{GA} + 2\text{Na}]^{2+}$  ions electrospayed from 100 nm DLPC (A), DPPC (B), POPC (C), DEPC (D), and DSPC (E-F) vesicles containing 0-40 mol% cholesterol (vertical, shown at right) plotted as relative abundance vs. CCS ( $\text{\AA}^2$ ). Acyl chain designations, lipid bilayer thickness ( $D_B$ ), and gel-to-liquid phase transition temperatures ( $T_M$ ) are provided for each lipid. Peaks fit using  $n=3$ . Conformers have been labeled according to the following scheme: Purple – Nascent conformer ( $660 \text{ \AA}^2$ ), Orange – PDH ( $675 \text{ \AA}^2$ ), Green – ADH ( $700 \text{ \AA}^2$ ), Blue – SSHH ( $725 \text{ \AA}^2$ ).

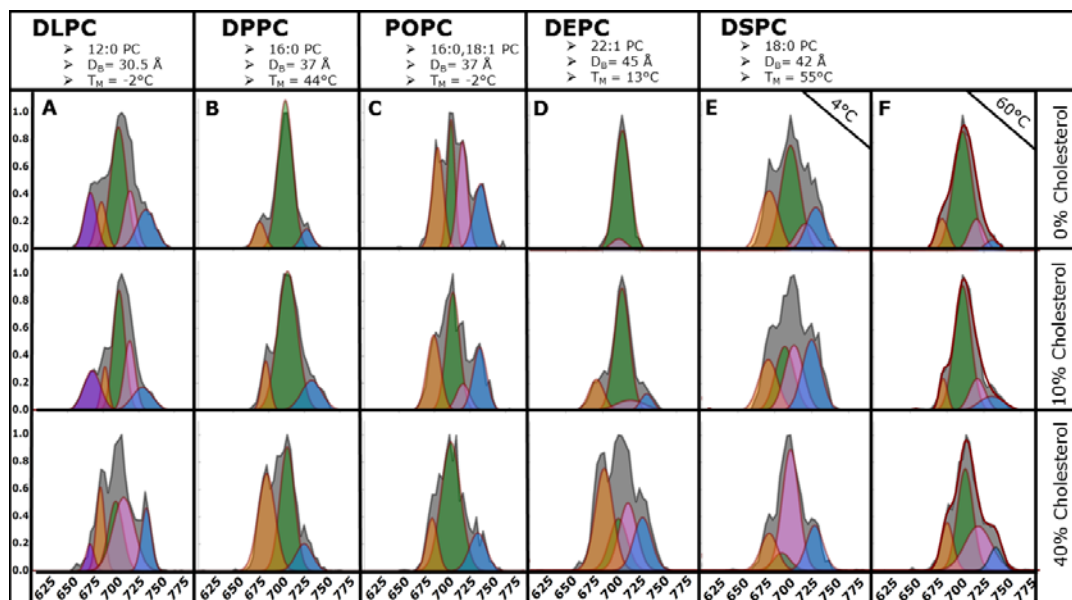

**Figure S2** - CCS profiles for  $[2\text{GA} + 2\text{Na}]^{2+}$  ions electrospayed from 100 nm DLPC (A), DPPC (B), POPC (C), DEPC (D), and DSPC (E-F) vesicles containing 0-40 mol% cholesterol (vertical, shown at right) plotted as relative abundance vs. CCS ( $\text{\AA}^2$ ). Acyl chain designations, lipid bilayer

thickness (DB), and gel-to-liquid phase transition temperatures (TM) are provided for each lipid. Peaks fit using  $n=4$ . Conformers have been labeled according to the following scheme: Purple – Nascent conformer (660 Å<sup>2</sup>), Orange – PDH (675 Å<sup>2</sup>), Green, Magenta – ADH (700 Å<sup>2</sup>), Blue – SSHH (725 Å<sup>2</sup>).
